# Supplementary material for: ATRP synthesis of polyallene-based amphiphilic triblock copolymer
Source: Royal Society of Chemistry journal article supplement (doi:10.1039/c7py01666b), 2017-01-01
Supplement: c7py01666b1.pdf [file c7py01666b1.pdf]

Supporting information for

# ATRP Synthesis of Polyallene-Based Amphiphilic Triblock Copolymer

*Aishun Ding,<sup>1,2,#</sup> Guolin Lu,<sup>1,#</sup> Hao Guo,<sup>2,\*</sup> Xiaoyu Huang<sup>1,\*</sup>*

<sup>1</sup> Key Laboratory of Synthetic and Self-Assembly Chemistry for Organic Functional Molecules, Shanghai Institute of Organic Chemistry, Chinese Academy of Sciences, 345 Lingling Road, Shanghai 200032, People's Republic of China

<sup>2</sup> Department of Chemistry, Fudan University, 220 Handan Road, Shanghai 200433, People's Republic of China

## Stability Test

The stability of Br-PPOA-Br **2** macroinitiator was tested under UV irradiation conditions as summarized in Table S1.

**Table S1.** Stability Test Conditions<sup>a</sup>

| Entry | Sample   | Condition       | Temperature (°C) | Time (h) |
|-------|----------|-----------------|------------------|----------|
| 1     | <b>2</b> | UV+benzophenone | 25               | 0.5      |
| 2     | <b>2</b> | UV+AIBN         | 25               | 0.5      |

<sup>a</sup> The amount of AIBN, BPO, and benzophenone is 5 equiv, solvent: toluene.

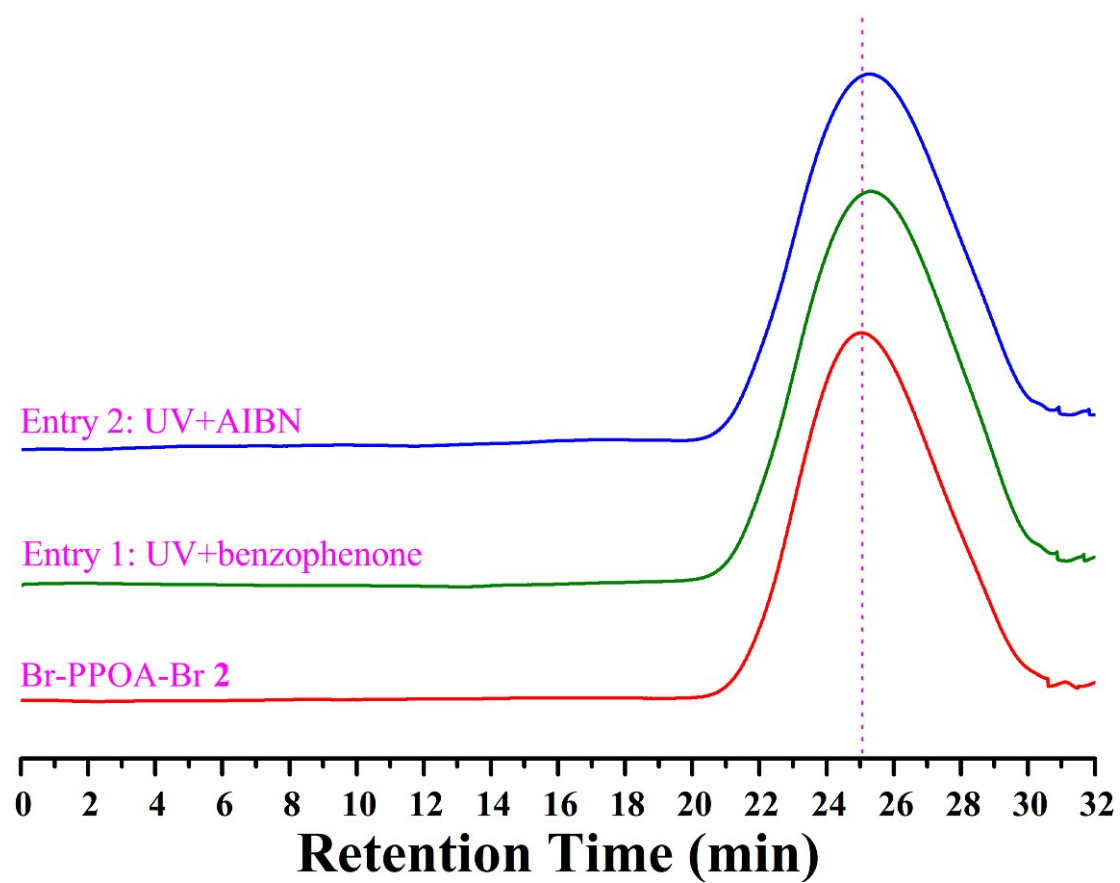

**Figure S1.** GPC traces of Br-PPOA-Br **2** before and after UV irradiation in THF.
